# Supplementary material for: Family History of Modifiable Risk Factors and Association With Future Cardiovascular Disease
Source: PubMed Central journal article supplement — J Am Heart Assoc. 2023 Mar 9;12(6):e027881. doi: 10.1161/JAHA.122.027881 (PMC10111537; doi:10.1161/jaha.122.027881), 2023-03-09
Supplement: JAH3-12-e027881-s001.pdf [file JAH3-12-e027881-s001.pdf]

# **SUPPLEMENTAL MATERIAL**

**Table S1. Baseline characteristics of offspring stratified by examination.**

| <b>Characteristics</b>             | <b>Offspring<br/>Exam 2<br/>n = 1795</b> | <b>Offspring<br/>Exam 6<br/>n = 1626</b> | <b>Gen 3<br/>Exam 1<br/>n = 2857</b> |
|------------------------------------|------------------------------------------|------------------------------------------|--------------------------------------|
| Age, years                         | 42 (10)                                  | 57 (9)                                   | 41 (8)                               |
| Women, n (%)                       | 919 (51)                                 | 860 (53)                                 | 1519 (53)                            |
| Body mass index, kg/m <sup>2</sup> | 25.7 (4.4)                               | 27.7 (5.1)                               | 26.9 (5.6)                           |
| Systolic blood pressure, mmHg      | 120 (17)                                 | 127 (19)                                 | 117 (15)                             |
| Diastolic blood pressure, mmHg     | 78 (10)                                  | 76 (10)                                  | 76 (10)                              |
| Total cholesterol, mg/dL           | 199 (38)                                 | 209 (42)                                 | 189 (35)                             |
| HDL, mg/dL                         | 49 (13)                                  | 52 (16)                                  | 54 (16)                              |
| Hypertension treatment, n (%)      | 145 (8)                                  | 357 (22)                                 | 279 (10)                             |
| Diabetes mellitus, n (%)           | 35 (2)                                   | 111 (7)                                  | 80 (3)                               |
| Smoking, n (%)                     | 701 (39)                                 | 252 (16)                                 | 480 (17)                             |
| Hypercholesterolemia, n (%)        | 239 (13)                                 | 324 (20)                                 | 399 (14)                             |
| <b>Parental History</b>            |                                          |                                          |                                      |
| Major CVD, n (%)                   | 895 (50)                                 | 1141 (70)                                | 742 (26)                             |
| Smoking, n (%)                     | 596 (42)                                 | 486 (31)                                 | 745 (26)                             |
| Hypertension, n (%)                | 923 (52)                                 | 1038 (64)                                | 1720 (60)                            |
| Obesity, n (%)                     | 588 (33)                                 | 508 (31)                                 | 1393 (49)                            |
| Diabetes mellitus, n (%)           | 256 (15)                                 | 284 (14)                                 | 437 (15)                             |
| Hypercholesterolemia, n (%)        | 675 (38)                                 | 511 (31)                                 | 1640 (57)                            |

Parental history is dichotomous and represents respective condition in either one of the parents. Data are shown as mean (SD) or otherwise noted.

Abbreviations: HDL = high-density lipoprotein, CVD = cardiovascular disease.

**Table S2. Clinical characteristics by number of parents with CVD history.**

| <b>Characteristics</b>             | <b>0 PHx of CVD<br/>n = 3500</b> | <b>1 PHx of CVD<br/>n = 2162</b> | <b>2 PHx of CVD<br/>n = 616</b> |
|------------------------------------|----------------------------------|----------------------------------|---------------------------------|
| Age, years                         | 41 (10)                          | 49 (11)                          | 54 (10)                         |
| Women, n (%)                       | 1855 (53)                        | 1131 (52)                        | 312 (51)                        |
| Body mass index, kg/m <sup>2</sup> | 26.3 (5.2)                       | 27.1 (5.0)                       | 27.8 (5.5)                      |
| Systolic blood pressure, mmHg      | 117 (15)                         | 123.7 (17.5)                     | 129.5 (18.9)                    |
| Diastolic blood pressure, mmHg     | 75 (10)                          | 77.2 (10.1)                      | 78.1 (10.3)                     |
| Total cholesterol, mg/dL           | 191 (36)                         | 204 (41)                         | 207 (37)                        |
| High density lipoprotein, mg/dL    | 53 (15)                          | 51 (16)                          | 49 (15)                         |
| Hypertension treatment, n (%)      | 251 (7)                          | 369 (17)                         | 161 (26)                        |
| Diabetes mellitus, n (%)           | 74 (2)                           | 112 (5)                          | 40 (6)                          |
| Smoking, n (%)                     | 744 (21)                         | 531 (25)                         | 158 (26)                        |
| <b>Parental History</b>            |                                  |                                  |                                 |
| Smoking, n (%)                     | 908 (28)                         | 717 (35)                         | 202 (35)                        |
| Hypertension, n (%)                | 1887 (54)                        | 1373 (64)                        | 421 (69)                        |
| Obesity, n (%)                     | 1463 (42)                        | 788 (36)                         | 238 (39)                        |
| Diabetes mellitus, n (%)           | 344 (10)                         | 461 (21)                         | 172 (28)                        |

Parental history of risk factors is dichotomous and represents respective condition in either one of the parents.

Parental history of CVD was shown as an ordinal variable (0 = no PHx, 1=PHx from one parent, 2=PHx from both parents).

Data are shown as mean (SD) or otherwise noted.

Abbreviations: CVD = cardiovascular disease, PHx = parental history.

\* Between-group differences were compared using Analysis of Covariance (ANCOVA) or Cochran-Mantel-Haenszel (CHM) test as appropriate.

**Table S3. Clinical characteristics by maternal vs paternal history of CVD.**

| <b>Characteristics</b>             | <b>Paternal PHx of CVD<br/>n = 1605</b> | <b>Maternal PHx of CVD<br/>n = 557</b> |
|------------------------------------|-----------------------------------------|----------------------------------------|
| Age, years                         | 48 (11)                                 | 52 (11)                                |
| Women, n (%)                       | 828 (52)                                | 303 (54)                               |
| Body mass index, kg/m <sup>2</sup> | 27.0 (5.0)                              | 27.6 (5.2)                             |
| Systolic blood pressure, mmHg      | 122.8 (17.0)                            | 126.6 (18.7)                           |
| Diastolic blood pressure, mmHg     | 77.1 (9.9)                              | 77.7 (10.6)                            |
| Total cholesterol, mg/dL           | 202 (41)                                | 208 (41)                               |
| High density lipoprotein, mg/dL    | 52 (16)                                 | 50 (16)                                |
| Hypertension treatment, n (%)      | 246 (15)                                | 123 (22)                               |
| Diabetes mellitus, n (%)           | 70 (4)                                  | 42 (8)                                 |
| Smoking, n (%)                     | 406 (25)                                | 125 (22)                               |
| <b>Parental History</b>            |                                         |                                        |
| Smoking, n (%)                     | 540 (36)                                | 177 (34)                               |
| Hypertension, n (%)                | 1009 (63)                               | 364 (66)                               |
| Obesity, n (%)                     | 580 (36)                                | 208 (37)                               |
| Diabetes mellitus, n (%)           | 307 (19)                                | 154 (28)                               |

Parental history is dichotomous and represents respective condition in either one of the parents.

Data are shown as mean (SD) or otherwise noted.

Abbreviations: CVD = cardiovascular disease, PHx = parental history.

\* Between-group differences were compared using Analysis of Covariance (ANCOVA) or Cochran-Mantel-Haenszel (CHM) test as appropriate.

**Table S4. Incidence rates of CV outcomes in offspring based on parental history of CVD and modifiable risk factors.**

| Parental History |                      | Incidence rate (events per 1000 person-years) |                     |         |                     |                        |         |
|------------------|----------------------|-----------------------------------------------|---------------------|---------|---------------------|------------------------|---------|
|                  |                      | +PHx CVD<br>+PHx RF                           | +PHx CVD<br>-PHx RF | p-value | -PHx CVD<br>+PHx RF | -PHx<br>CVD<br>-PHx RF | p-value |
| CVD<br>n=353     | Smoking              | 7.45                                          | 6.64                | 0.38    | 2.08                | 1.68                   | 0.37    |
|                  | Hypertension         | 6.50                                          | 7.14                | 0.47    | 1.70                | 1.99                   | 0.45    |
|                  | Diabetes             | 6.87                                          | 6.82                | 0.95    | 1.83                | 1.83                   | 0.99    |
|                  | Obesity              | 6.77                                          | 6.86                | 0.47    | 1.96                | 1.74                   | 0.45    |
|                  | Hypercholesterolemia | 6.18                                          | 7.37                | 0.16    | 1.65                | 1.98                   | 0.38    |
| AF<br>n=264      | Smoking              | 5.17                                          | 5.03                | 0.87    | 1.15                | 1.42                   | 0.48    |
|                  | Hypertension         | 4.88                                          | 5.39                | 0.50    | 1.60                | 1.04                   | 0.09    |
|                  | Diabetes             | 3.75                                          | 5.50                | 0.05    | 1.82                | 1.30                   | 0.36    |
|                  | Obesity              | 4.55                                          | 5.42                | 0.25    | 1.39                | 1.33                   | 0.86    |
|                  | Hypercholesterolemia | 4.29                                          | 5.77                | 0.04    | 1.16                | 1.51                   | 0.29    |
| HF<br>n=90       | Smoking              | 2.00                                          | 1.90                | 0.82    | 0.38                | 0.29                   | 0.63    |
|                  | Hypertension         | 1.65                                          | 2.38                | 0.12    | 0.37                | 0.26                   | 0.49    |
|                  | Diabetes             | 1.91                                          | 1.88                | 0.96    | 0.20                | 0.33                   | 0.63    |
|                  | Obesity              | 1.72                                          | 1.99                | 0.56    | 0.33                | 0.30                   | 0.86    |
|                  | Hypercholesterolemia | 1.63                                          | 2.10                | 0.30    | 0.27                | 0.36                   | 0.56    |
| MI<br>n=181      | Smoking              | 3.75                                          | 3.49                | 0.71    | 0.54                | 0.97                   | 0.15    |
|                  | Hypertension         | 3.38                                          | 3.75                | 0.55    | 0.74                | 1.04                   | 0.26    |
|                  | Diabetes             | 4.09                                          | 3.38                | 0.32    | 1.01                | 0.86                   | 0.73    |
|                  | Obesity              | 3.49                                          | 3.57                | 0.89    | 0.81                | 0.92                   | 0.69    |
|                  | Hypercholesterolemia | 3.21                                          | 3.73                | 0.39    | 0.84                | 0.89                   | 0.84    |

\* p-value was calculated for incidence rate ratios using Poisson regression.

Abbreviations: CVD = cardiovascular disease, AF= atrial fibrillation, HF = heart failure, MI = myocardial infarction, PHx = parental history.

**Table S5. Age-adjusted incidence rates of CV outcomes in offspring.**

| Parental History |                      | Incidence rate (events per 1000 person-years) |                     |         |                     |                        |         |
|------------------|----------------------|-----------------------------------------------|---------------------|---------|---------------------|------------------------|---------|
|                  |                      | +PHx CVD<br>+PHx RF                           | +PHx CVD<br>-PHx RF | p-value | -PHx CVD<br>+PHx RF | -PHx<br>CVD<br>-PHx RF | p-value |
| CVD<br>n=353     | Smoking              | 4.20                                          | 3.16                | 0.03    | 2.33                | 1.68                   | 0.17    |
|                  | Hypertension         | 3.41                                          | 3.40                | 0.98    | 1.70                | 2.13                   | 0.28    |
|                  | Diabetes             | 3.64                                          | 3.46                | 0.73    | 1.94                | 1.88                   | 0.93    |
|                  | Obesity              | 3.86                                          | 3.24                | 0.18    | 2.24                | 1.66                   | 0.15    |
|                  | Hypercholesterolemia | 3.60                                          | 3.41                | 0.67    | 1.88                | 1.88                   | 1       |
| AF<br>n=264      | Smoking              | 2.46                                          | 2.00                | 0.18    | 1.24                | 1.33                   | 0.81    |
|                  | Hypertension         | 2.09                                          | 2.05                | 0.90    | 1.51                | 1.00                   | 0.11    |
|                  | Diabetes             | 1.61                                          | 2.27                | 0.07    | 1.79                | 1.24                   | 0.31    |
|                  | Obesity              | 2.16                                          | 2.08                | 0.79    | 1.51                | 1.17                   | 0.29    |
|                  | Hypercholesterolemia | 2.09                                          | 2.15                | 0.85    | 1.30                | 1.30                   | 0.99    |
| HF<br>n=90       | Smoking              | 0.84                                          | 0.64                | 0.29    | 0.39                | 0.26                   | 0.44    |
|                  | Hypertension         | 0.61                                          | 0.75                | 0.36    | 0.33                | 0.23                   | 0.49    |
|                  | Diabetes             | 0.70                                          | 0.65                | 0.77    | 0.19                | 0.29                   | 0.67    |
|                  | Obesity              | 0.70                                          | 0.63                | 0.65    | 0.34                | 0.25                   | 0.52    |
|                  | Hypercholesterolemia | 0.68                                          | 0.65                | 0.85    | 0.29                | 0.28                   | 0.96    |
| MI<br>n=181      | Smoking              | 2.71                                          | 2.25                | 0.31    | 0.61                | 1.05                   | 0.2     |
|                  | Hypertension         | 2.33                                          | 2.45                | 0.77    | 0.77                | 1.19                   | 0.16    |
|                  | Diabetes             | 2.81                                          | 2.27                | 0.27    | 1.11                | 0.94                   | 0.72    |
|                  | Obesity              | 2.54                                          | 2.30                | 0.58    | 0.94                | 0.96                   | 0.95    |
|                  | Hypercholesterolemia | 2.39                                          | 2.39                | >0.99   | 0.97                | 0.94                   | 0.91    |

\* p-value was calculated for incidence rate ratios using Poisson regression.

Abbreviations: CVD = cardiovascular disease, AF= atrial fibrillation, HF = heart failure, MI = myocardial infarction, PHx = parental history.

**Table S6. Number of events stratified by parental history in 0, 1, or 2 parents.**

| Parental history exposure |                               | Incident CVD offspring |                   |         |
|---------------------------|-------------------------------|------------------------|-------------------|---------|
|                           |                               | N (%)                  | HR (95% CI)       | p-value |
| CVD                       | PHx of CVD = 0 (n = 3500)     | 92(3)                  | REF               |         |
|                           | PHx of CVD = 1 (n = 2162)     | 164(8)                 | 1.51 (1.15, 1.98) | 0.003   |
|                           | PHx of CVD = 2 (n = 616)      | 97 (16)                | 2.37 (1.74, 3.23) | <0.001  |
| Smoking                   | PHx of smoking = 0 (n = 3434) | 155 (5)                | REF               |         |
|                           | PHx of smoking = 1 (n = 1265) | 80 (6)                 | 1.29 (0.98, 1.69) | 0.07    |
|                           | PHx of smoking = 2 (n = 325)  | 22 (7)                 | 1.60 (1.02, 2.51) | 0.04    |
| Obesity                   | PHx of obesity = 0 (n = 3791) | 216 (6)                | REF               |         |
|                           | PHx of obesity = 1 (n = 2048) | 116 (6)                | 1.30 (1.03, 1.63) | 0.03    |
|                           | PHx of obesity = 2 (n = 439)  | 21 (5)                 | 1.49 (0.95, 2.34) | 0.08    |

Parental history was shown as ordinal variables (0 = no PHx, 1=PHx from one parent, 2=PHx from both parents).  
Abbreviations: CVD = cardiovascular disease, PHx = parental history.

\* HRs and 95% CIs were calculated using Cox proportional hazard regression models adjusted for age and sex.

**Table S7. Baseline echocardiographic characteristics of offspring.**

| Characteristics | Total        | PHx of HF      | No PHx of HF  | p-value |
|-----------------|--------------|----------------|---------------|---------|
|                 | n = 6278     | n = 1003       | n = 5275      |         |
| LVEDD, cm       | 4.9 (0.4)    | 4.9 (0.5)      | 4.9 (0.4)     | 0.19    |
| LVEDS, cm       | 3.1 (0.4)    | 3.1 (0.4)      | 3.1 (0.4)     | 0.97    |
| LAD, cm         | 3.3 (0.7)    | 3.7 (0.7)      | 3.3 (0.7)     | <0.001  |
| FS, %           | 36.4 (4.1)   | 37.0 (4.8)     | 36.3 (4.0)    | 0.01    |
| LVWT, cm        | 1.8 (0.3)    | 1.9 (0.3)      | 1.8 (0.3)     | <0.001  |
| GLS, %          | -20.2 (3.2)  | -20.1 (3.2)    | -20.2 (3.2)   | 0.008   |
| LV Mass, g      | 157.1 (45.0) | 165.4 (47.8)   | 155.6 (44.3)  | <0.001  |
|                 |              | PHx of CVD     | No PHx of CVD |         |
|                 |              | n = 1775       | n = 4503      |         |
| CAC Score       | 0 (0, 33.6)  | 3.7 (0, 115.8) | 0 (0, 2.3)    | <0.001  |

Data shown as mean (SD) or median (Q1, Q3).

Data on coronary artery calcification not available for exam 2.

Abbreviations: LVEDD = left ventricular end-diastolic dimension, LVEDS = left ventricular end-systolic dimension, LAD = left atrial diameter, FS = fractional shortening, LVWT = left ventricular wall thickness, GLS = global longitudinal strain, LV Mass = left ventricular mass, CAC = coronary artery calcification, PHx = parental history, HF = heart failure, CVD = cardiovascular disease.
